# Supplementary material
Source: Research Square preprint supplement (doi:10.21203/rs.3.rs-9531746/v1)
Supplement: Supplementary file 1 [file 0cc45ca4fdb07241cec0f884.docx]

# 11. STROBE 22-item checklist (cross-sectional)

| # | Item | Section / page |
| --- | --- | --- |
| 1a | Indicate study design in title/abstract | Title page; Abstract |
| 1b | Informative summary in abstract | Structured abstract |
| 2 | Background/rationale | Background §1–§3 |
| 3 | Objectives | Background §4 |
| 4 | Study design | Methods – Statistical analysis |
| 5 | Setting | Methods – Data sources; Study sample |
| 6 | Participants | Methods – Study sample |
| 7 | Variables | Methods – Five-factor operationalisation; Outcomes |
| 8 | Data sources/measurement | Methods – Data sources; Outcomes |
| 9 | Bias | Methods – Sensitivity analyses; Limitations |
| 10 | Study size | Methods – Study sample (n=234,440) |
| 11 | Quantitative variables | Methods – Five-factor operationalisation |
| 12 | Statistical methods | Methods – Statistical analysis |
| 13 | Participants flow | Results – Sample |
| 14 | Descriptive data | Results – Sample; Tables 1–2 |
| 15 | Outcome data | Results – Risk-factor and outcome prevalence; Table 2 |
| 16 | Main results | Results – Main models; Tables 3–4 |
| 17 | Other analyses | Results – Cross-level GII; PAR; Sensitivity |
| 18 | Key results | Discussion – Principal findings |
| 19 | Limitations | Discussion – Limitations |
| 20 | Interpretation | Discussion – Comparison; Public health implications |
| 21 | Generalisability | Discussion – China benchmark; Limitations |
| 22 | Funding | Declarations – Funding |

*End of main manuscript. Cover letter, Plain English Summary, suggested reviewer list, X thread, submission checklist, OSF README, and R reproducibility scripts are provided as separate files.*
